# Supplementary material for: The Naturalized Vascular Flora of Malesia
Source: Research Square preprint supplement (doi:10.21203/rs.3.rs-1666818/v1), 2022-06-08
Supplement: Supplementary file 2 [file 99d9d96fa2e3df9ef4a68c33.csv]

Island	Phyto	x_coord	y_coord	area	bio1_mean	bio2_mean	bio3_mean	bio4_mean	bio5_mean	bio6_mean	bio7_mean	bio8_mean	bio9_mean	bio10_mean	bio11_mean	bio12_mean	bio13_mean	bio14_mean	bio15_mean	bio16_mean	bio17_mean	bio18_mean	bio19_mean	alt_mean	alt_median	alt_range	perc_urb	perc_agri	pop_sum	pop_dens	Island_nam	GDP_sum	Native_ric	Naturalize
BOR	Sunda	114.21948	0.85898	736746.24	26.025530096342894	8.356641399966158	88.840070525046983	31.234921688893301	30.867403403557987	21.457612782103180	9.409790621454807	25.870737944748260	26.051973598196827	26.392660622087082	25.645395343585612	3028.361683001797701	336.107753871136140	165.928811691700986	22.747874005947146	939.153511569912439	549.502812735602902	745.234094995070450	852.716116685031579	252.740737606967372	95.000000000000000	3993.000000000000000	0.221	32.499	24428364.301162540912628	33.157	Borneo	320640653151.863769531250000	7384	194
JAV	Sunda	110.07243	-7.28687	131696.68	24.632497838565278	8.238130556263672	79.722175880441952	48.729134417868949	29.803256652836939	19.453188533488387	10.350068119501975	24.419612490992748	24.339441778423549	25.171449111848879	24.052829114780156	2419.139639639639427	369.092503217503236	57.258848133848133	58.810466939418014	1012.236486486486456	209.371943371943360	554.470559845559819	547.367277992277991	323.939754536439636	150.000000000000000	3419.000000000000000	8.408	61.438	154221980.766874074935913	1171.039	Java	1543323556487.000000000000000	1524	435
LSI	Wallacea	121.30743	-8.96809	87137.60	24.840272143287379	8.023020912899010	71.530927328587737	84.124191159807566	30.371310980766648	19.108636929170927	11.262674051595720	25.149936989044040	24.024307765635839	25.782457970992780	23.700309740423865	1581.039416058394181	296.965450121654555	15.699999999999999	79.839349353168416	809.460583941605705	70.692457420924569	478.355961070559601	108.576642335766422	395.804907594948986	316.000000000000000	3439.000000000000000	1.189	61.208	16362967.765115782618523	187.783	Lesser Sunda Islands	58728062948.055664062500000	1213	400
MAL	Wallacea	128.85895	-2.69095	76223.83	25.619959323697238	7.440414052394044	81.755579377075065	57.620161583549098	30.324573705871856	21.194553981569552	9.130019724302302	25.531076901970891	25.626507932368209	26.152757235096654	24.815380997513603	2291.438969764837566	314.174132138857772	91.295072788353849	38.275016474430132	851.485442329227340	322.811590145576702	500.354423292273225	648.982362821948527	287.979381789298202	172.000000000000000	2802.000000000000000	0.112	12.420	3099547.750114472582936	40.664	Maluku Islands	5065098576.145996093750000	2436	87
NWG	Sahul	141.54350	-5.33073	873067.65	24.124717926875103	8.556331552944242	83.706619393906550	57.131418064669688	29.356986683378125	19.121654359427740	10.235332323559277	24.345237695715760	23.757699747880785	24.675157452270827	23.332631843307450	3044.941195098779644	348.462497868505011	171.033324401354406	25.532978788490482	974.901853791625058	558.873596258312887	823.823560936396234	642.246230298896535	548.377647686908972	147.000000000000000	4872.000000000000000	0.059	9.731	17153117.213532518595457	19.647	New Guinea	93643912541.727050781250000	13331	338
PHI	Wallacea	122.87448	11.76302	293237.50	25.705898219350406	8.125058640962598	72.264526808622705	94.686861847823579	31.550694058786998	20.215183410523348	11.335510648229612	25.545925986487685	25.310364513312798	26.788317781050228	24.458301586059079	2526.736721873215174	393.751142204454595	78.824671616219305	52.177999382356717	1049.685608223872123	270.435893774985743	563.021987435751043	492.009565962307249	327.211536762673347	177.000000000000000	2806.000000000000000	0.796	61.111	101233075.345443874597549	345.226	Philippines	643597443542.417968750000000	9186	539
PENM	Sunda	102.17617	4.03852	131395.47	25.774742861608143	8.241996562546706	83.088904690641911	56.987944085425426	31.005085600927565	21.080224949831468	9.924860651096097	25.314854673579394	25.861581692793120	26.440272877565334	25.008943756150565	2546.708373904576547	384.380071405387866	117.279779292437524	37.840607884254446	969.284160986692655	405.338851022395318	558.579357351509202	752.865303472898404	212.677443633414441	80.000000000000000	2063.000000000000000	2.617	47.113	26952666.870314724743366	205.126	Peninsular Malaysia	576760043105.455078125000000	6554	231
SGP	Sunda	103.81347	1.35892	510.50	26.809648513793945	6.859657402038574	84.666532897949239	45.295394592285149	30.961205749511720	22.861305160522463	8.099900588989257	26.239696731567381	27.103363723754882	27.299455947875977	26.177092437744140	2320.199999999999818	296.680000000000007	153.280000000000001	22.169877471923829	765.799999999999955	472.600000000000023	525.759999999999991	756.639999999999986	21.867892976588628	19.000000000000000	95.000000000000000	56.133	28.159	4193099.760396003723145	8213.712	Singapore	339808061440.000000000000000	1488	569
SUL	Wallacea	121.28419	-2.10047	185728.01	24.346474615348505	8.343938029382032	84.672116890019481	39.281292748766930	29.446028798465147	19.564385312167680	9.881643486462178	24.277974840931737	24.421979814791857	24.760233468520759	23.834021167392763	2165.578123200921254	277.984686240644805	93.826943005181349	33.164134405835583	753.337593552101339	321.908462867012076	424.778929188255631	566.482095567069678	538.290539515598880	370.000000000000000	3258.000000000000000	0.918	32.986	20392912.477438073605299	109.800	Sulawesi	101990003038.923339843750000	2805	129
SUM	Sunda	101.67324	-0.45998	471869.44	25.108445247132867	8.273215311465911	87.862728045294944	36.618338372886093	29.994732881356157	20.575179866281250	9.419553015182638	24.790916768088213	25.182728013668687	25.560783075233790	24.673428470995439	2671.751434639194031	324.289910080882009	123.871537662102938	30.941614018535436	899.990782160769868	416.330757760607298	623.744792372689972	821.668474086123524	284.805101243287822	59.000000000000000	3519.000000000000000	0.465	56.262	59201702.976495116949081	125.462	Sumatra	508522556609.900390625000000	2860	183
